# Supplementary material for: The Relationship between Dog Ownership, Psychopathological Symptoms and Health-Benefitting Factors in Occupations at Risk for Traumatization
Source: PubMed Central journal article supplement (PMC7178020; doi:10.3390/ijerph17072562), 2020-04-08
Supplement: ijerph-17-02562-s001.pdf [file ijerph-17-02562-s001.pdf]

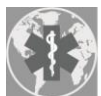

Supplementary Material A

# The Relationship between Pet Ownership, Psychopathological Symptoms and Health-benefitting Factors in Occupations at Risk for Traumatization

Johanna Lass-Hennemann<sup>1</sup>, Sarah K. Schäfer<sup>2</sup>, M. Roxanne Sopp<sup>3</sup> and Tanja Michael<sup>4,\*</sup>

Saarland University, Department of Psychology; 66123 Saarbrücken, Germany; sarah.schaefer@uni-saarland.de (S.K.S.); roxanne.sopp@uni-saarland.de (M.R.S.); t.michael@mx.uni-saarland.de (T.M.)

<sup>◦</sup> Shared first authorship

\* Correspondence: lass-hennemann@mx.uni-saarland.de; Tel.: +49-681-302-71011 (JLH)

## 1. Results for the Comparison Between Dog/Cat Owners and Others

### 1.1. Demographic Group Differences Between Dog/Cat Owners and Others

Sample characteristics of dog/cat owners and others are presented in Table A-1. Dog/cat owners and others were not different regarding the proportion of women,  $\chi^2(1) = 3.12, p = 0.077$ , age,  $t(575) = 1.24, p = 0.214$ , and job experience,  $t(544) = 0.55, p = 0.586$ . However, dog/cat owners were more likely to live together with a partner or family as compared to non-dog owners,  $\chi^2(1) = 10.76, p = 0.001$ . Moreover, dog/cat owners and others did neither differ with respect to their frequency in working shifts,  $\chi^2(1) = 1.61, p = 0.204$ , nor to the proportion of those working night shifts or on standby duty.

**Table 1.** Sample characteristics for dog/cat owners and others.

|                                          | Dog/cat owners | Others        | $\chi^2/t(df)$      | <i>p</i> |
|------------------------------------------|----------------|---------------|---------------------|----------|
| Sex (% women)                            | 44.70          | 37.40         | $\chi^2(1) = 3.12$  | 0.077    |
| Age (in years)                           | 38.89 (11.19)  | 37.68 (11.80) | $t(575) = 1.24$     | 0.214    |
| Form of living (living alone, %)         | 16.3           | 27.8          | $\chi^2(1) = 10.76$ | 0.001    |
| Job experience (in years)                | 16.99 (11.10)  | 16.44 (11.87) | $t(544) = 0.55$     | 0.586    |
| Shift work (%)                           | 63.0           | 57.8          | $\chi^2(1) = 1.61$  | 0.204    |
| Night shifts (% of those working shifts) | 82.60          | 85.50         | $\chi^2(1) = 0.55$  | 0.495    |
| Standby duty (% of those working shifts) | 36.60          | 29.00         | $\chi^2(1) = 2.04$  | 0.154    |

Note. df = degree of freedom.

Numbers in brackets indicate standard deviations or degrees of freedom.

### 1.2. Group Differences: Psychopathological Symptoms

*General mental health problems.* A *t*-test for independent samples with group (dog/cat owner vs. others) as independent variable and GSI scores as dependent variable revealed no significant group difference,  $t(569) = 1.07, p = 0.285, d = 0.09$ . Moreover, there were no moderating effects of gender,  $F(1,567) = 0.25, p = 0.616, \eta^2_p = 0.00$ , and age,  $F(1,564) = 0.18, p = 0.672, \eta^2_p = 0.00$ . Furthermore, it did not impact on the findings if individuals live alone or together with a partner or family,  $F(1,567) = 0.09, p = 0.766, \eta^2_p = 0.00$ .

*Posttraumatic stress symptoms.* A *t*-test for independent samples with dog/cat owner versus others as independent variable and IES-R total scores as dependent variable did not show a significant between-group difference,  $t(496) = 0.09, p = 0.931, d = 0.01$ . As for general mental health problems, there were no moderating effects of age,  $F(1,491) = 0.01, p = 0.913, \eta^2_p = 0.00$ , and form of living,  $F(1,494) = 1.32, p = 0.250, \eta^2_p = 0.00$ . However, respondents' gender showed an impact on PTSD symptom levels: Women reported higher levels of PTSD symptoms,  $F(1,494) = 6.99, p = 0.008, \eta^2_p =$

0.02. Moreover, there was a significant interaction of dog/cat-ownership and gender,  $F(1,494) = 4.03$ ,  $p = 0.045$ ,  $\eta^2_p = 0.01$ . Post-hoc comparisons showed that among non-dog/cat owners women and men did not differ in PTSD symptoms,  $t(287) = 0.48$ ,  $p = 0.643$ ,  $d = 0.06$ , while women reported more severe PTSD symptoms in the group of dog/cat owners,  $t(207) = 3.12$ ,  $p = 0.002$ ,  $d = 0.43$ .

*Burnout symptoms.* A MANOVA with dog/cat owner versus others as between-subject factor and burnout symptoms (emotional exhaustion, depersonalization, and personal accomplishment) as dependent variable did not result in significant group differences,  $F(3,567) = 0.06$ ,  $p = .983$ ,  $\eta^2_p = 0.00$ . Moreover, there was no significant moderator effect of gender,  $F(1,565) = 0.09$ ,  $p = .964$ ,  $\eta^2_p = 0.00$ , age,  $F(1,562) = 0.25$ ,  $p = 0.859$ ,  $\eta^2_p = 0.00$ , and form of living,  $F(1,565) = 1.04$ ,  $p = 0.374$ ,  $\eta^2_p = 0.01$ .

### 1.3. Group Differences: Health-Benefitting Factors

*Sense of coherence.* A *t*-test for independent samples with dog/cat owner versus others as independent variable and SOC scores as dependent variable did not show significant group differences,  $t(578) = 0.34$ ,  $p = 0.731$ ,  $d = 0.03$ . Furthermore, there were no moderator effects of gender,  $F(1,576) = 0.60$ ,  $p = 0.440$ ,  $\eta^2_p = .00$ , age,  $F(1,573) = 1.04$ ,  $p = 0.309$ ,  $\eta^2_p = 0.00$ , and form of living,  $F(1,576) = 1.84$ ,  $p = 0.175$ ,  $\eta^2_p = 0.00$ .

*Trait-resilience.* In line with the findings on SOC, a *t*-test for independent samples with trait-resilience as dependent variable did not reveal significant differences between dog/cat owners and others,  $t(576) = 0.85$ ,  $p = 0.398$ ,  $d = 0.07$ . As for SOC, there were no significant moderating effects, gender:  $F(1,574) = 0.77$ ,  $p = 0.380$ ,  $\eta^2_p = 0.00$ , age:  $F(1,571) = 0.23$ ,  $p = 0.636$ ,  $\eta^2_p = 0.00$ , form of living:  $F(1,574) = 0.60$ ,  $p = 0.440$ ,  $\eta^2_p = 0.00$ .

*Locus of control.* A MANOVA with dog/cat owner versus others as between-subject factor and external as well as internal LOC as dependent variables also did not result in a significant between group difference,  $F(2,577) = 0.21$ ,  $p = 0.809$ ,  $\eta^2_p = .0001$ . Moreover, we did not find moderator effects, gender:  $F(1,575) = 0.48$ ,  $p = 0.622$ ,  $\eta^2_p = 0.00$ , age:  $F(1,572) = 2.62$ ,  $p = 0.074$ ,  $\eta^2_p = 0.01$ , form of living:  $F(1,575) = 2.46$ ,  $p = 0.086$ ,  $\eta^2_p = 0.01$ .

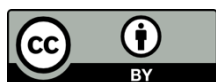

© 2020 by the authors. Licensee MDPI, Basel, Switzerland. This article is an open access article distributed under the terms and conditions of the Creative Commons Attribution (CC BY) license (<http://creativecommons.org/licenses/by/4.0/>).
